# Supplementary material for: Magnetic Resonance Imaging‐Derived Microvascular Perfusion Modeling to Assess Peripheral Artery Disease
Source: PubMed Central journal article supplement — J Am Heart Assoc. 2023 Jan 23;12(3):e027649. doi: 10.1161/JAHA.122.027649 (PMC9973623; doi:10.1161/jaha.122.027649), 2023-01-23
Supplement: JAH3-12-e027649-s001.pdf [file JAH3-12-e027649-s001.pdf]

# **Supplemental Material**

**Table S1. Computational microvascular model parameters of PAD patients and controls for skeletal calf muscle compartments.**

| Variable                             | Muscle group | Control              | PAD                  | Pooled               | P-Value |
|--------------------------------------|--------------|----------------------|----------------------|----------------------|---------|
| $k^t$ (1/s)                          | AM           | 2.80 (2.36, 3.24)    | 11.50 (7.52, 15.49)  | 8.39 (5.63, 11.16)   | 0.018   |
|                                      | LM           | 2.45 (2.08, 2.81)    | 7.46 (3.83, 11.09)   | 5.67 (3.28, 8.05)    | 0.042   |
|                                      | DM           | 3.26 (2.95, 3.57)    | 6.76 (6.10, 7.42)    | 5.51 (4.89, 6.13)    | <0.001  |
|                                      | SM           | 2.42 (2.15, 2.69)    | 6.00 (5.33, 6.67)    | 4.72 (4.09, 5.35)    | <0.001  |
|                                      | GM           | 1.34 (1.09, 1.58)    | 3.71 (2.15, 5.26)    | 2.86 (1.83, 3.89)    | 0.026   |
| $K_{\text{tissue}}$ ( $\text{m}^2$ ) | AM           | 1.81 (1.81, 1.81)    | 5.46 (4.95, 5.96)    | 4.15 (3.58, 4.72)    | <0.001  |
|                                      | LM           | 1.81 (1.81, 1.81)    | 3.63 (3.35, 3.92)    | 2.98 (2.69, 3.28)    | <0.001  |
|                                      | DM           | 1.81 (1.81, 1.81)    | 4.07 (3.65, 4.50)    | 3.27 (2.87, 3.66)    | <0.001  |
|                                      | SM           | 1.81 (1.81, 1.81)    | 3.69 (3.40, 3.98)    | 3.02 (2.72, 3.33)    | <0.001  |
|                                      | GM           | 1.81 (1.81, 1.81)    | 4.71 (4.00, 5.42)    | 3.68 (3.09, 4.26)    | <0.001  |
| $\phi$                               | AM           | 0.61 (0.61, 0.62)    | 0.43 (0.39, 0.46)    | 0.49 (0.46, 0.53)    | <0.001  |
|                                      | LM           | 0.61 (0.59, 0.62)    | 0.56 (0.54, 0.57)    | 0.57 (0.56, 0.59)    | <0.001  |
|                                      | DM           | 0.67 (0.65, 0.70)    | 0.48 (0.44, 0.53)    | 0.55 (0.51, 0.59)    | <0.001  |
|                                      | SM           | 0.63 (0.62, 0.64)    | 0.44 (0.41, 0.48)    | 0.51 (0.48, 0.54)    | <0.001  |
|                                      | GM           | 0.83 (0.77, 0.88)    | 0.43 (0.39, 0.47)    | 0.57 (0.51, 0.63)    | <0.001  |
| OFC (1/Pa s)                         | AM           | 12.62 (10.22, 15.02) | 8.05 (6.72, 9.39)    | 9.68 (8.38, 10.99)   | 0.001   |
|                                      | LM           | 13.60 (11.74, 15.46) | 12.96 (10.93, 15.00) | 13.19 (11.76, 14.63) | 0.67    |
|                                      | DM           | 13.85 (12.19, 15.51) | 11.31 (9.42, 13.19)  | 12.21 (10.86, 13.57) | 0.07    |
|                                      | SM           | 13.88 (12.38, 15.38) | 11.88 (9.96, 13.79)  | 12.59 (11.26, 13.93) | 0.15    |
|                                      | GM           | 12.92 (11.36, 14.48) | 11.29 (10.04, 12.55) | 11.87 (10.90, 12.85) | 0.11    |
| $p_v$ (mmHg)                         | AM           | 49.33 (48.81, 49.85) | 51.22 (49.75, 52.69) | 50.54 (49.57, 51.52) | 0.06    |
|                                      | LM           | 49.00 (48.07, 49.93) | 52.51 (50.72, 54.30) | 51.26 (50.00, 52.51) | 0.006   |
|                                      | DM           | 49.16 (48.82, 49.50) | 57.79 (55.01, 58.56) | 54.06 (52.57, 55.56) | <0.001  |
|                                      | SM           | 49.23 (48.55, 49.92) | 50.64 (49.60, 51.69) | 50.14 (49.42, 50.86) | 0.06    |
|                                      | GM           | 49.32 (48.63, 50.01) | 51.50 (50.43, 52.56) | 50.72 (49.95, 51.49) | 0.005   |

All values are expressed as medians and interquartile ranges (IQRs). P-values were calculated with the Kruskal-Wallis rank test. Control group:  $n = 20$ ; PAD group:  $n = 36$ . Leg muscle groups: AM: anterior muscle, LM: lateral muscle, DM: deep posterior muscle, SM: soleus muscle, GM: gastrocnemius muscle.  $k^t$ , transfer rate constant;  $K_{\text{tissue}}$ , interstitial permeability;  $\phi$ , porosity (values in the range from 0 to 1); OFC, outflow filtration coefficient;  $p_v$ , microvascular pressure. PAD: peripheral artery disease. Pooled: includes both PAD patients and controls.

**Table S2. Computational microvascular model parameters of non-diabetic and diabetic study participants for skeletal calf muscle compartments.**

| Variable                             | Muscle group | Non-diabetics        | Diabetics            | P-value |
|--------------------------------------|--------------|----------------------|----------------------|---------|
| $k^i$ (1/s)                          | AM           | 8.57 (4.38, 12.77)   | 8.07 (5.74, 10.40)   | 0.86    |
|                                      | LM           | 5.85 (2.34, 9.36)    | 5.34 (2.71, 7.97)    | 0.84    |
|                                      | DM           | 5.12 (4.36, 5.88)    | 6.21 (5.10, 7.31)    | 0.10    |
|                                      | SM           | 4.46 (3.66, 5.26)    | 5.20 (4.09, 6.30)    | 0.27    |
|                                      | GM           | 3.00 (1.38, 4.61)    | 2.62 (2.14, 3.10)    | 0.73    |
| $K_{\text{tissue}}$ ( $\text{m}^2$ ) | AM           | 3.58 (2.92, 4.23)    | 5.19 (4.21, 6.17)    | 0.005   |
|                                      | LM           | 2.70 (2.35, 3.05)    | 3.50 (3.00, 4.00)    | 0.009   |
|                                      | DM           | 2.89 (2.46, 3.31)    | 3.95 (3.17, 4.73)    | 0.009   |
|                                      | SM           | 2.77 (2.40, 3.13)    | 3.48 (2.97, 4.00)    | 0.023   |
|                                      | GM           | 3.55 (2.81, 4.29)    | 3.90 (2.86, 4.93)    | 0.58    |
| $\varphi$                            | AM           | 0.50 (0.46, 0.54)    | 0.48 (0.41, 0.54)    | 0.44    |
|                                      | LM           | 0.58 (0.56, 0.59)    | 0.57 (0.55, 0.60)    | 0.70    |
|                                      | DM           | 0.55 (0.51, 0.60)    | 0.54 (0.47, 0.61)    | 0.80    |
|                                      | SM           | 0.52 (0.48, 0.56)    | 0.49 (0.44, 0.55)    | 0.39    |
|                                      | GM           | 0.62 (0.54, 0.69)    | 0.48 (0.38, 0.58)    | 0.026   |
| OFC<br>(1/Pa s)                      | AM           | 9.96 (8.20, 11.72)   | 9.19 (7.16, 11.22)   | 0.58    |
|                                      | LM           | 12.64 (11.22, 14.06) | 14.18 (10.91, 17.46) | 0.31    |
|                                      | DM           | 11.87 (10.66, 13.08) | 12.83 (9.52, 16.14)  | 0.50    |
|                                      | SM           | 12.58 (11.08, 14.08) | 12.62 (9.81, 15.42)  | 0.98    |
|                                      | GM           | 12.06 (10.91, 13.22) | 11.53 (9.62, 13.45)  | 0.61    |
| $p_v$<br>(mmHg)                      | AM           | 50.00 (49.07, 50.93) | 51.52 (49.28, 53.76) | 0.14    |
|                                      | LM           | 51.15 (49.77, 52.52) | 51.46 (48.75, 54.17) | 0.82    |
|                                      | DM           | 52.55 (51.00, 54.09) | 56.80 (53.85, 59.75) | 0.005   |
|                                      | SM           | 49.65 (48.75, 50.56) | 51.01 (49.79, 52.23) | 0.07    |
|                                      | GM           | 50.55 (49.77, 51.32) | 51.03 (49.28, 52.77) | 0.56    |

All values are medians and interquartile range (IQR). P-values were calculated with the Kruskal-Wallis rank test. Non-diabetics group:  $n = 36$ ; diabetics group:  $n = 20$ . Leg muscle groups: AM: anterior muscle, LM: lateral muscle, DM: deep posterior muscle, SM: soleus muscle, GM: gastrocnemius muscle.  $k^i$ , transfer rate constant;  $K_{\text{tissue}}$ , interstitial permeability;  $\varphi$ , porosity (values in the range from 0 to 1); OFC, outflow filtration coefficient;  $p_v$ , microvascular pressure; PAD: peripheral artery disease.

**Table S3. Computational microvascular model parameters of PAD treadmill completers and non-completers for skeletal calf muscle compartments.**

| Variable                             | Muscle group | Completers           | Non-Completers       | P-value |
|--------------------------------------|--------------|----------------------|----------------------|---------|
| $k^t$ (1/s)                          | AM           | 10.03 (2.63, 17.43)  | 13.15 (10.18, 16.11) | 0.44    |
|                                      | LM           | 6.57 (2.71, 10.42)   | 8.45 (1.60, 15.31)   | 0.61    |
|                                      | DM           | 5.54 (4.65, 6.44)    | 8.12 (7.70, 8.53)    | <0.001  |
|                                      | SM           | 4.71 (3.98, 5.44)    | 7.44 (6.76, 8.12)    | <0.001  |
|                                      | GM           | 3.89 (0.81, 6.98)    | 3.50 (3.38, 3.63)    | 0.80    |
| $K_{\text{tissue}}$ ( $\text{m}^2$ ) | AM           | 4.82 (4.18, 5.47)    | 6.16 (5.47, 6.86)    | 0.005   |
|                                      | LM           | 3.27 (2.79, 3.75)    | 4.04 (3.88, 4.20)    | 0.004   |
|                                      | DM           | 3.75 (2.99, 4.50)    | 4.44 (4.09, 4.79)    | 0.10    |
|                                      | SM           | 3.35 (2.98, 3.73)    | 4.08 (3.67, 4.48)    | 0.009   |
|                                      | GM           | 3.41 (2.58, 4.23)    | 6.17 (5.45, 6.89)    | <0.001  |
| $\phi$                               | AM           | 0.49 (0.44, 0.53)    | 0.36 (0.33, 0.40)    | <0.001  |
|                                      | LM           | 0.58 (0.56, 0.60)    | 0.53 (0.51, 0.55)    | <0.001  |
|                                      | DM           | 0.57 (0.53, 0.62)    | 0.38 (0.34, 0.42)    | <0.001  |
|                                      | SM           | 0.50 (0.46, 0.55)    | 0.38 (0.35, 0.40)    | <0.001  |
|                                      | GM           | 0.51 (0.46, 0.56)    | 0.34 (0.31, 0.36)    | <0.001  |
| OFC<br>(1/Pa s)                      | AM           | 7.16 (4.95, 9.38)    | 9.05 (7.56, 10.54)   | 0.16    |
|                                      | LM           | 15.40 (13.56, 17.24) | 10.25 (6.68, 13.81)  | 0.008   |
|                                      | DM           | 13.15 (11.03, 15.27) | 9.24 (6.09, 12.39)   | 0.033   |
|                                      | SM           | 15.42 (13.97, 16.88) | 7.92 (5.18, 10.65)   | <0.001  |
|                                      | GM           | 13.71 (12.26, 15.16) | 8.59 (7.41, 9.77)    | <0.001  |
| $p_v$<br>(mmHg)                      | AM           | 49.90 (47.52, 52.27) | 52.69 (51.10, 54.29) | 0.05    |
|                                      | LM           | 51.48 (48.76, 54.20) | 53.66 (51.22, 56.11) | 0.22    |
|                                      | DM           | 54.62 (51.92, 57.32) | 59.21 (57.35, 61.07) | 0.007   |
|                                      | SM           | 49.74 (47.94, 51.54) | 51.65 (50.73, 52.57) | 0.06    |
|                                      | GM           | 50.01 (48.37, 51.66) | 53.16 (52.26, 54.06) | 0.002   |

All values are medians and interquartile range (IQR). P-values were calculated with the Kruskal-Wallis rank test. Completers PAD group:  $n = 19$ ; Non-completers PAD group:  $n = 17$ . Leg muscle groups: AM: anterior muscle, LM: lateral muscle, DM: deep posterior muscle, SM: soleus muscle, GM: gastrocnemius muscle.  $k^t$ , transfer rate constant;  $K_{\text{tissue}}$ , interstitial permeability;  $\phi$ , porosity (values in the range from 0 to 1); OFC, outflow filtration coefficient;  $p_v$ , microvascular pressure; PAD: peripheral artery disease.
